# Supplementary material
Source: publisher figshare collection journal article supplement (https://karger.figshare.com/articles/dataset/_/5127268)

$\beta$ -TCP only

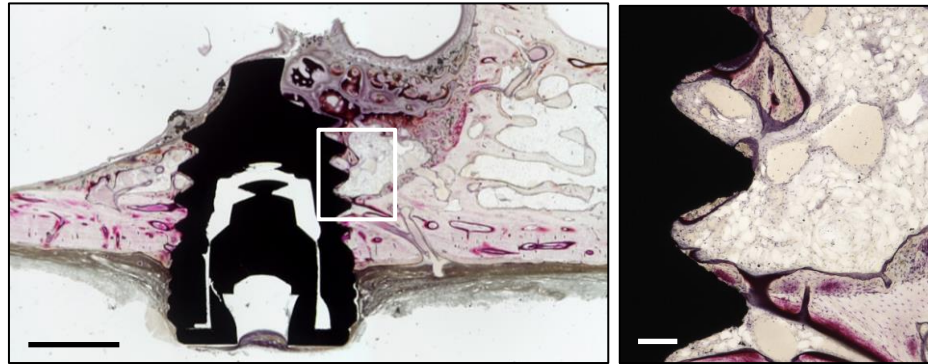

E-BMP-2  
+  
 $\beta$ -TCP

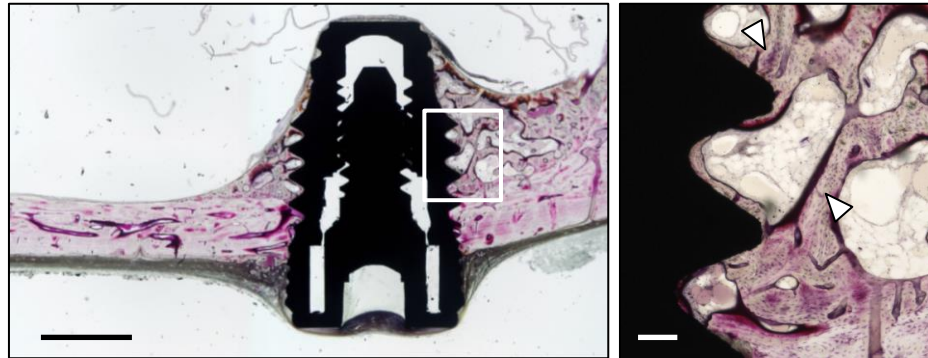

autogenous  
bone graft

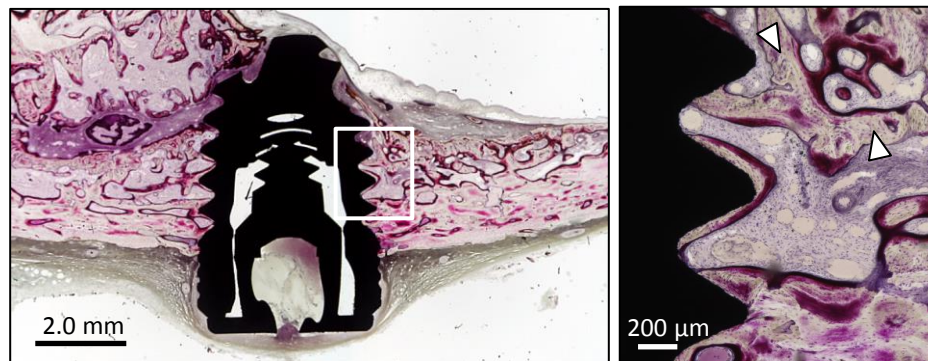

Supplemental Fig. 1 Ono et al.

Supplement: Supplementary file 1 [file 1]
